# Supplementary material for: Neuromodulation in Pediatric Migraine using Repetitive Neuromuscular Magnetic Stimulation: A Feasibility Study
Source: MDPI journal article supplement (doi:10.3390/children10111764), 2023-10-30
Supplement: s1 [file s1]

## Supplements

**Supplementary Table S1:** Screening. Screening and reasons of exclusion.

| Reason of ineligibility                                  | n   | %    |
|----------------------------------------------------------|-----|------|
| Screening                                                | 248 | 100  |
| Exclusion                                                | 228 | 92   |
| No migraine diagnosis                                    | 84  | 36.9 |
| No mTrP in M. trapezius                                  | 57  | 25   |
| Not in age range (< 6 years, > 18 years)                 | 13  | 5.7  |
| Headache frequency not applicable (< 6 days in 3 months) | 32  | 14   |
| Pharmacological prophylaxis                              | 3   | 1.3  |
| Familial hemiplegic migraine                             | 2   | 0.9  |
| Neurological/psychiatric disorder                        | 15  | 6.6  |
| Other severe disease                                     | 4   | 1.8  |
| Epilepsy                                                 | 1   | 0.4  |
| No consent: no interest                                  | 10  | 4.4  |
| No consent: too time-consuming                           | 6   | 2.6  |

|                                                          |    |      |
|----------------------------------------------------------|----|------|
| No consent: distance b/w home and treatment too far      | 1  | 0.4  |
| <b>Exclusion after baseline</b>                          | 6  | 2.4  |
| Headache frequency not applicable (< 6 days in 3 months) | 3  | 50   |
| mTrP after baseline not applicable                       | 2  | 33.3 |
| No consent: no interest                                  | 1  | 16.7 |
| <b>Inclusion</b>                                         | 14 | 5.6  |
| <b>Exclusion from analysis</b>                           | 1  | 0.4  |
| <i>Abbreviations: mTrP = myofascial trigger point</i>    |    |      |

**Supplementary Table S2:** Participants' characteristics. More detailed characteristics of the study participants.

| Characteristics                               | n(%)      | Characteristics                                      | n(%)       |
|-----------------------------------------------|-----------|------------------------------------------------------|------------|
| Other diagnoses (multiple answers possible)   |           | Headache characteristics (multiple answers possible) |            |
| Cyclic vomiting                               | 2 (15.4%) | Pulsating                                            | 8 (61.5%)  |
| Scoliosis                                     | 1 (7.7%)  | Dull/pressing                                        | 9 (69.2%)  |
| Tricuspid insufficiency                       | 1 (7.7%)  | Pulling                                              | 2 (15.4%)  |
| Underweight                                   | 1 (7.7%)  | Not known                                            | 2 (15.4%)  |
| Vitamin D deficiency                          | 1 (7.7%)  | Vomiting                                             | 5 (38.5%)  |
| Myopia                                        | 1 (7.7%)  | Nausea                                               | 11 (84.6%) |
| Hyperopia                                     | 1 (7.7%)  | Photophobia                                          | 10 (76.9%) |
| Sleep disturbances                            | 1 (7.7%)  | Phonophobia                                          | 11 (84.6%) |
| Asthma                                        | 1 (7.7%)  | Odor-sensitive                                       | 2 (15.4%)  |
| Allergies                                     | 1 (7.7%)  | Tearing eyes                                         | 1 (7.7%)   |
| Flat foot                                     | 1 (7.7%)  | Running nose                                         | 1 (7.7%)   |
| Headache triggers (multiple answers possible) |           | Visual disturbances                                  | 2 (15.4%)  |

|                       |            |                                              |            |
|-----------------------|------------|----------------------------------------------|------------|
| No triggers           | 5 (38.5%%) | Acute medication (multiple answers possible) |            |
| Stress                | 3 (23.1%)  | No medication                                |            |
| Regeneration          | 1 (7.7%)   | Ibuprofen                                    | 10 (76.9%) |
| Heat                  | 1 (7.7%)   | Naproxen                                     | 3 (23.1%)  |
| Media                 | 1 (7.7%)   | Triptan                                      | 4 (30.8%)  |
| Wheat                 | 1 (7.7%)   | Paracetamol                                  | 2 (15.4%)  |
| Noise                 | 1 (7.7%)   | Acetylsalicylic acid (ASS)                   | 2 (15.4%)  |
| Car                   | 1 (7.7%)   | Magnesium prophylaxis                        |            |
| Bicycle               | 1 (7.7%)   | Yes                                          | 9 (69.2%)  |
| Prodromal symptoms    |            | No                                           | 4 (30.8%)  |
| No precursors         | 8 (61.5%)  |                                              |            |
| Flicker               | 4 (30.7%)  |                                              |            |
| Dizziness             | 1 (7.7%)   |                                              |            |
| Headache localization |            |                                              |            |
| Bilateral             | 7 (53.8%)  |                                              |            |
| Unilateral            | 2 (15.4%)  |                                              |            |
| Mixed                 | 4 (30.8%)  |                                              |            |

**Supplementary Table S3:** Changes in monthly headache frequency of n=11 patients for the first month, second month, and third month after rNMS intervention compared to baseline.

| Time point      | Monthly headache       | <i>F</i> | <i>p</i> |
|-----------------|------------------------|----------|----------|
|                 | frequency<br>Mean (SD) |          |          |
|                 |                        | 1.76     | 0.204    |
| <b>Baseline</b> | 10.03 (6.20)           |          |          |
| <b>FU 1</b>     | 6.27 (4.52)            |          |          |
| <b>FU 2</b>     | 6.45 (7.12)            |          |          |
| <b>FU 3</b>     | 9.00 (6.65)            |          |          |

*Pairwise comparisons showed no significant differences between time points. Abbreviations: SD = standard deviation, FU 1 = follow-up one month after rNMS, FU 2 = follow-up two months after rNMS, FU 3 = follow-up three months after rNMS.*

**Supplementary Table S4:** Individual changes from baseline to FU in PedMIDAS scores, monthly headache frequency, headache intensity, and medication intake.

| Patient Number | Individual changes from baseline to FU (%) |                                  |                           |                                 |
|----------------|--------------------------------------------|----------------------------------|---------------------------|---------------------------------|
|                | PedMIDAS score                             | Headache frequency in days/month | Headache intensity in VAS | Medication intake in days/month |
| 1              | -2.00 (-10)                                | 1.34 (31)                        | -0.99 (-19)               | 1.00 (23)                       |
| 2              | -13.00 (-93)                               | -2.00 (-100)                     | -                         | -                               |
| 3              | -5.00 (-24)                                | 6.70 (74)                        | -0.35 (-5)                | 0.33 (7)                        |
| 4              | -11.00 (-46)                               | -5.00 (-38)                      | -1.11 (-23)               | -2.00 (-67)                     |
| 5              | 10.00 (21)                                 | 0.67 (13)                        | -                         | -                               |
| 6              | -9.00 (-60)                                | -3.66 (-50)                      | 0.59 (9)                  | -3.00 (-60)                     |
| 7              | -92.00 (-99)                               | -11.33 (-79)                     | -0.73 (-11)               | -8.67 (-81)                     |
| 9              | -22.00 (-42)                               | -3.00 (-23)                      | 1.37 (31)                 | -0.66 (-50)                     |
| 10             | 20.00 (95)                                 | -0.67 (-6)                       | 1.75 (28)                 | -0.01 (-0.4)                    |
| 11             | -10.00 (-38)                               | -1.66 (-36)                      | 2.52 (61)                 | -1.00 (-33)                     |
| 12             | -30.00 (-49)                               | -1.33 (-11)                      | 1.53 (30)                 | 0.34 (5)                        |
| 13             | 0 (0)                                      | -12.00 (-52)                     | 3.15 (61)                 | -5.00 (-94)                     |
| 14             | -8.00 (-33)                                | -1.00 (-30)                      | -                         | 0 (0)                           |

*Abbreviations: FU = follow-up*

**Supplementary Table S5.** A) Comparison of PPT before the first (pre1) and before the last treatment sessions (pre6). B) Comparison of PPT after the first (post1) and after the last treatment sessions (post6).

| A) Pre1-pre6 comparison |                  |          |             |             |                |                | B) Post1-post6 comparison |          |             |             |                |                |
|-------------------------|------------------|----------|-------------|-------------|----------------|----------------|---------------------------|----------|-------------|-------------|----------------|----------------|
| PPT                     | Test values      |          | Mean pre    | Mean post   | Confidence     |                | Test values               |          | Mean pre    | Mean post   | Confidence     |                |
|                         |                  |          | (SD)        | (SD)        | interval       |                |                           |          | (SD)        | (SD)        | interval       |                |
|                         | <i>t/Z</i>       | <i>p</i> |             |             | Lower<br>value | Upper<br>value | <i>t/Z</i>                | <i>p</i> |             |             | Lower<br>value | Upper<br>value |
| Left lateral            | <i>t</i> = -3.06 | .010*    | 1.83 (.86)  | 2.91 (1.54) | -1.85          | -.31           | <i>t</i> = -2.56          | .025*    | 2.09 (.84)  | 3.27 (2.00) | -2.18          | -.17           |
| Left medial             | <i>Z</i> = -1.99 | .046*    | 2.04 (.81)  | 2.83 (1.67) | -              | -              | <i>t</i> = -2.22          | .047*    | 2.16 (.93)  | 3.23 (1.86) | -2.11          | -.02           |
| Right medial            | <i>t</i> = -2.02 | .066     | 2.02 (.94)  | 2.90 (1.61) | -1.84          | .07            | <i>Z</i> = -1.99          | .046*    | 1.98 (.79)  | 2.99 (1.67) | -              | -              |
| Right lateral           | <i>t</i> = -3.00 | .011*    | 1.86 (1.09) | 2.80 (1.39) | -1.62          | -.26           | <i>t</i> = -2.91          | .013*    | 1.97 (1.12) | 3.31 (2.02) | -2.33          | -.34           |
| TrP left                | <i>t</i> = -2.02 | .078     | 1.77 (.57)  | 3.01 (1.96) | -2.67          | .02            | <i>t</i> = -2.29          | .052     | 2.03 (.72)  | 3.52 (2.33) | -3.00          | -.23           |

|           |             |       |            |             |       |      |             |      |            |             |       |     |
|-----------|-------------|-------|------------|-------------|-------|------|-------------|------|------------|-------------|-------|-----|
| TrP right | $t = -2.79$ | .019* | 1.66 (.71) | 3.10 (1.85) | -2.59 | -.29 | $t = -2.00$ | .073 | 2.04 (.73) | 3.18 (2.18) | -2.41 | .13 |
|-----------|-------------|-------|------------|-------------|-------|------|-------------|------|------------|-------------|-------|-----|

---

*Comparisons of PPT using paired t-tests or Wilcoxon tests depending on normality. Significant differences at  $\alpha=0.05$  are marked with an asterisk (\*).*

*Abbreviations: PPT = pressure pain threshold, SD = standard deviation*
